# Supplementary material for: Comparison of GeneXpert MRSA/SA ETA assay with semi-quantitative and quantitative cultures and nuc gene-based qPCR for detection of Staphylococcus aureus in endotracheal aspirate samples
Source: PubMed Central journal article supplement (PMC6321727; doi:10.1186/s13756-018-0460-8), 2019-01-05
Supplement: 13756_2018_460_MOESM1_ESM.pdf [file 13756_2018_460_MOESM1_ESM.pdf]

**Supplementary Table 1:** Overview of the results obtained on 79 ETAs using SQ-culture, the GeneXpert assay, Q-culture, enrichment-based culture, and in-house *nuc* gene-based qPCR.

0-4: negative (0), light (1), moderate (2) and heavy (3).

| Sample ID | SQ-culture method          |     | Extended gold standard <sup>#</sup> | GeneXpert assay           |          | Q-culture                 |          | Enrichment-based culture  | <i>Nuc</i> gene-based qPCR |          |
|-----------|----------------------------|-----|-------------------------------------|---------------------------|----------|---------------------------|----------|---------------------------|----------------------------|----------|
|           | <i>S. aureus</i> detected* | 0-4 |                                     | <i>S. aureus</i> detected | Ct value | <i>S. aureus</i> detected | CFU/ml   | <i>S. aureus</i> detected | <i>S. aureus</i> detected  | Ct value |
| 1         | -                          | 0   | -                                   | -                         | 39       | -                         | 0,00E+00 | -                         | -                          | 38       |
| 2         | -                          | 0   | -                                   | -                         | 39       | -                         | 0,00E+00 | -                         | -                          | 38       |
| 3         | -                          | 0   | -                                   | -                         | 39       | -                         | 0,00E+00 | -                         | -                          | 38       |
| 4         | -                          | 0   | -                                   | -                         | 39       | -                         | 0,00E+00 | -                         | -                          | 38       |
| 5         | -                          | 0   | -                                   | -                         | 39       | -                         | 0,00E+00 | -                         | -                          | 38       |
| 6         | -                          | 0   | -                                   | -                         | 39       | -                         | 0,00E+00 | -                         | -                          | 38       |
| 7         | -                          | 0   | -                                   | -                         | 39       | -                         | 0,00E+00 | -                         | -                          | 38       |
| 8         | -                          | 0   | -                                   | -                         | 39       | -                         | 0,00E+00 | -                         | -                          | 38       |
| 9         | -                          | 0   | -                                   | -                         | 39       | -                         | 0,00E+00 | -                         | -                          | >38      |
| 10        | -                          | 0   | -                                   | -                         | 39       | -                         | 0,00E+00 | -                         | -                          | >38      |
| 11        | -                          | 0   | -                                   | -                         | 39       | -                         | 0,00E+00 | -                         | -                          | >38      |
| 12        | -                          | 0   | -                                   | -                         | 39       | -                         | 0,00E+00 | -                         | -                          | >38      |
| 13        | -                          | 0   | -                                   | -                         | 39       | -                         | 0,00E+00 | -                         | -                          | >38      |
| 14        | -                          | 0   | -                                   | -                         | 39       | -                         | 0,00E+00 | -                         | -                          | >38      |
| 15        | -                          | 0   | -                                   | -                         | 39       | -                         | 0,00E+00 | -                         | -                          | >38      |
| 16        | -                          | 0   | -                                   | -                         | 39       | -                         | 0,00E+00 | -                         | -                          | >38      |
| 17        | -                          | 0   | -                                   | -                         | 39       | -                         | 0,00E+00 | -                         | -                          | >38      |
| 18        | -                          | 0   | -                                   | -                         | 36       | -                         | 0,00E+00 | -                         | -                          | >38      |
| 19        | -                          | 0   | -                                   | -                         | 39       | -                         | 0,00E+00 | -                         | -                          | >38      |
| 20        | -                          | 0   | -                                   | -                         | 38       | -                         | 0,00E+00 | -                         | -                          | 38       |
| 21        | -                          | 0   | -                                   | -                         | 39       | -                         | 0,00E+00 | -                         | +                          | 25       |
| 22        | -                          | 0   | -                                   | -                         | 39       | -                         | 0,00E+00 | -                         | +                          | 30       |
| 23        | -                          | 0   | -                                   | -                         | 39       | -                         | 0,00E+00 | -                         | +                          | 31       |
| 24        | -                          | 0   | -                                   | -                         | 39       | -                         | 0,00E+00 | -                         | +                          | 34       |
| 25        | -                          | 0   | -                                   | -                         | 39       | -                         | 0,00E+00 | -                         | +                          | 35       |
| 26        | -                          | 0   | -                                   | -                         | 39       | -                         | 0,00E+00 | -                         | +                          | 35       |
| 27        | -                          | 0   | -                                   | -                         | 39       | -                         | 0,00E+00 | -                         | +                          | 35       |
| 28        | -                          | 0   | -                                   | -                         | 39       | -                         | 0,00E+00 | -                         | +                          | 35       |
| 29        | -                          | 0   | -                                   | -                         | 39       | -                         | 0,00E+00 | -                         | +                          | 36       |
| 30        | -                          | 0   | -                                   | -                         | 39       | -                         | 0,00E+00 | -                         | +                          | 36       |
| 31        | -                          | 0   | -                                   | -                         | 39       | -                         | 0,00E+00 | -                         | +                          | 36       |
| 32        | -                          | 0   | -                                   | -                         | 39       | -                         | 0,00E+00 | -                         | +                          | 36       |
| 33        | -                          | 0   | -                                   | -                         | 39       | -                         | 0,00E+00 | -                         | +                          | 37       |
| 34        | -                          | 0   | -                                   | -                         | 39       | -                         | 0,00E+00 | -                         | +                          | 37       |
| 35        | -                          | 0   | -                                   | -                         | 39       | -                         | 0,00E+00 | -                         | +                          | 37       |
| 36        | -                          | 0   | -                                   | -                         | 39       | -                         | 0,00E+00 | +                         | +                          | >38      |
| 37        | -                          | 0   | -                                   | -                         | 39       | +                         | 8,48E+02 | +                         | +                          | 29       |
| 38        | -                          | 0   | -                                   | -                         | 39       | +                         | 4,00E+01 | +                         | +                          | 35       |
| 39        | -                          | 0   | +                                   | +                         | 29       | +                         | 3,00E+03 | +                         | +                          | 30       |
| 40        | -                          | 0   | +                                   | +                         | 29       | +                         | 1,77E+05 | +                         | +                          | 32       |
| 41        | +                          | 1   | +                                   | +                         | 31       | +                         | 5,60E+01 | +                         | +                          | 24       |
| 42        | +                          | 1   | +                                   | +                         | 34       | +                         | 8,64E+02 | +                         | +                          | 27       |
| 43        | +                          | 3   | +                                   | +                         | 19       | +                         | 8,56E+06 | +                         | +                          | 19       |
| 44        | +                          | 3   | +                                   | +                         | 17       | +                         | 2,65E+08 | +                         | +                          | 21       |
| 45        | +                          | 3   | +                                   | +                         | 16       | +                         | 7,80E+08 | +                         | +                          | 21       |
| 46        | +                          | 2   | +                                   | +                         | 18       | +                         | 2,04E+07 | +                         | +                          | 24       |
| 47        | +                          | 3   | +                                   | +                         | 14       | +                         | 4,39E+08 | +                         | +                          | 24       |
| 48        | +                          | 1   | +                                   | +                         | 24       | +                         | 6,05E+04 | +                         | +                          | 25       |
| 49        | +                          | 3   | +                                   | +                         | 22       | +                         | 1,59E+05 | +                         | +                          | 25       |
| 50        | +                          | 3   | +                                   | +                         | 19       | +                         | 1,56E+06 | +                         | +                          | 25       |
| 51        | +                          | 1   | +                                   | +                         | 21       | +                         | 5,12E+02 | +                         | +                          | 25       |
| 52        | +                          | 2   | +                                   | +                         | 26       | +                         | 9,44E+02 | +                         | +                          | 26       |
| 53        | +                          | 2   | +                                   | +                         | 23       | +                         | 1,92E+05 | +                         | +                          | 26       |
| 54        | +                          | 2   | +                                   | +                         | 26       | +                         | 6,42E+03 | +                         | +                          | 27       |
| 55        | +                          | 1   | +                                   | +                         | 25       | +                         | 7,38E+04 | +                         | +                          | 27       |
| 56        | +                          | 1   | +                                   | +                         | 28       | +                         | 3,51E+05 | +                         | +                          | 27       |
| 57        | +                          | 1   | +                                   | +                         | 24       | +                         | 2,40E+05 | +                         | +                          | 27       |
| 58        | +                          | 3   | +                                   | +                         | 22       | +                         | 9,31E+06 | +                         | +                          | 27       |
| 59        | +                          | 1   | +                                   | +                         | 30       | +                         | 9,60E+01 | +                         | +                          | 27       |
| 60        | +                          | 2   | +                                   | +                         | 31       | +                         | 0,00E+00 | +                         | +                          | 28       |
| 61        | +                          | 2   | +                                   | +                         | 25       | +                         | 5,71E+05 | +                         | +                          | 28       |
| 62        | +                          | 1   | +                                   | +                         | 34       | +                         | 8,80E+01 | +                         | +                          | 28       |
| 63        | +                          | 2   | +                                   | +                         | 26       | +                         | 0,00E+00 | +                         | +                          | 28       |
| 64        | +                          | 1   | +                                   | +                         | 27       | +                         | 1,04E+02 | +                         | +                          | 29       |
| 65        | +                          | 2   | +                                   | +                         | 25       | +                         | 3,16E+04 | +                         | +                          | 29       |
| 66        | +                          | 3   | +                                   | +                         | 24       | +                         | 1,47E+05 | +                         | +                          | 30       |
| 67        | +                          | 3   | +                                   | +                         | 30       | +                         | 2,59E+03 | +                         | +                          | 31       |
| 68        | +                          | 2   | +                                   | +                         | 33       | +                         | 0,00E+00 | +                         | +                          | 31       |
| 69        | +                          | 1   | +                                   | +                         | 30       | +                         | 8,00E+00 | +                         | +                          | 32       |
| 70        | +                          | 1   | +                                   | +                         | 28       | +                         | 1,04E+02 | +                         | +                          | 32       |
| 71        | +                          | 1   | +                                   | +                         | 30       | +                         | 2,06E+03 | +                         | +                          | 32       |
| 72        | +                          | 1   | +                                   | +                         | 35       | +                         | 0,00E+00 | +                         | +                          | 33       |
| 73        | +                          | 1   | +                                   | +                         | 31       | +                         | 3,99E+03 | +                         | +                          | 33       |
| 74        | +                          | 3   | +                                   | +                         | 27       | +                         | 6,69E+03 | +                         | +                          | 35       |
| 75        | +                          | 1   | +                                   | +                         | 30       | +                         | 4,88E+02 | +                         | +                          | 36       |
| 76        | +                          | 1   | +                                   | +                         | 29       | +                         | 2,14E+04 | +                         | +                          | 36       |
| 77        | +                          | 1   | +                                   | +                         | 32       | +                         | 4,80E+02 | +                         | +                          | 36       |
| 78        | +                          | 1   | +                                   | +                         | 34       | +                         | 0,00E+00 | +                         | +                          | 36       |
| 79        | +                          | 2   | +                                   | +                         | 27       | +                         | 8,32E+04 | +                         | +                          | 31       |

\* +/-: Sample detected positive or negative for *S. aureus*

# *S. aureus* detected by standard culture plus two samples that showed *S. aureus* presence by the other four methods but not by SQ-culture

0-4: Growth in four quadrants of SQ-culture. CFU: colony forming units
